# Supplementary material
Source: Springer Nature journal article supplement (https://www.springermedizin.de/resource/supplementary/12967_2012_1097_MOESM1_ESM.pdf/9573284)

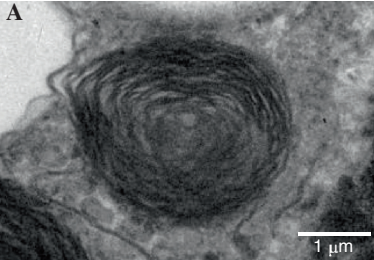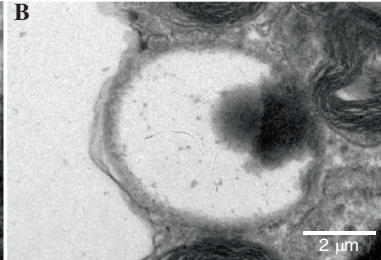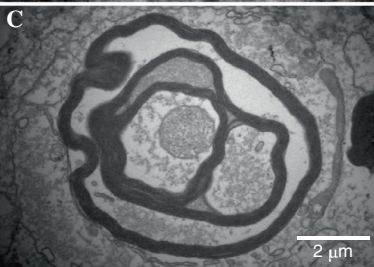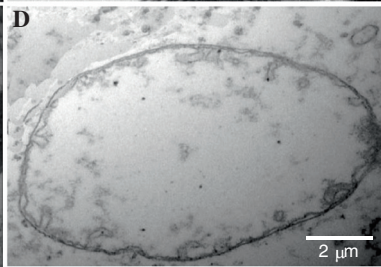

Supplement: MOESM1 [file 9573284]
